# Supplementary material for: Effect of polymer ligand structures on fluorescence of gold clusters prepared by photoreduction
Source: Royal Society of Chemistry journal article supplement (doi:10.1039/c2nr33693f), 2013-01-01
Supplement: c2nr33693f.pdf [file c2nr33693f.pdf]

## Supporting Information

# Effect of Polymer Ligand Structures on Fluorescence of Gold Clusters Prepared by Photoreduction

*Luo Li,<sup>†</sup> Zhen Li,<sup>‡</sup> Hui Zhang,<sup>†</sup> Shoucun Zhang,<sup>†</sup> Irfan Majeed,<sup>†</sup> and Bien Tan<sup>†\*</sup>*

<sup>†</sup>School of Chemistry and Chemical Engineering, Huazhong University of Science and Technology, Wuhan 430074 (P.R. China), <sup>‡</sup> Institute for Superconducting and Electronic Materials, Australian Institute of Innovative Materials, University of Wollongong, NSW 2500 (Australia).

AUTHOR EMAIL ADDRESS: [bien.tan@mail.hust.edu.cn](mailto:bien.tan@mail.hust.edu.cn);

**RECEIVED DATE (to be automatically inserted after your manuscript is accepted if required according to the journal that you are submitting your paper to)**

CORRESPONDING AUTHOR FOOTNOTE: <sup>†</sup>School of Chemistry and Chemical Engineering, Huazhong University of Science and Technology, Wuhan, 430074, China. Fax: +86 27 87543632; Tel: +86 27 87558172; Email: bien.tan@mail.hust.edu.cn.

### Contents:

**SI-1: The Characterization of Polymer Ligands.**

**SI-2: The Characterization of Au NCs@PTMP-PMMA, Au NCs@PTMP-PBMA, and Au NCs@PTMP-PtBMA.**

**SI-3: References and Notes.**

## SI-1: The Characterization of Polymer Ligands.

**Gel Permeation Chromatography.** GPC was performed with an Agilent 1100 instrument using refractive index detector (RID) in order to obtain the molecular weights of polymer ligands. THF was used as the eluent at a flow rate of 1.0 mL/min at 23 °C. The calculated molecular weights were based on a calibration curve for polystyrene standards of narrow polydispersity (Polymer Laboratories).

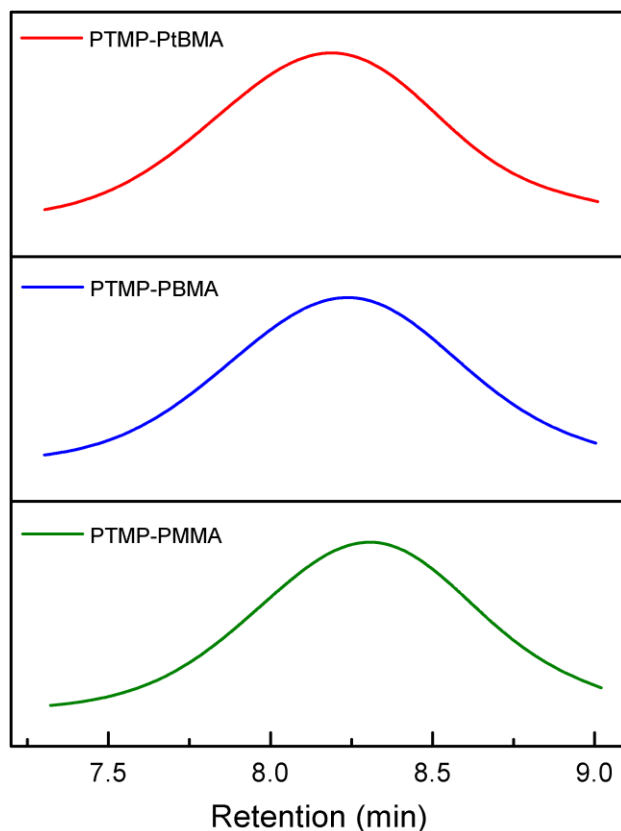

**Fig. S1** GPC elution curves of polymer ligands PTMP-PMMA, PTMP-PBMA, and PTMP-PtBMA, respectively.

**<sup>1</sup>H NMR Spectroscopy.** <sup>1</sup>H NMR spectra were recorded in CDCl<sub>3</sub> on a Bruker AV400 MHz spectrometer at room temperature using the  $\delta$  scale and tetramethylsilane (TMS) as an internal standard. The <sup>1</sup>H NMR spectra were similar to our previous works.<sup>1</sup>

PTMP-PMMA (CDCl<sub>3</sub>)  $\delta$  (ppm): 0.76-1.10 CH<sub>3</sub>, 1.35-1.5 SH (from PTMP), 1.72-2.12 CH<sub>2</sub>, 2.47-2.63 CH<sub>2</sub> (from PTMP), 2.63-2.78 CH<sub>2</sub> (from PTMP), 3.52-3.65 CH<sub>3</sub>, 4.08-4.18 CH<sub>2</sub> (from PTMP)

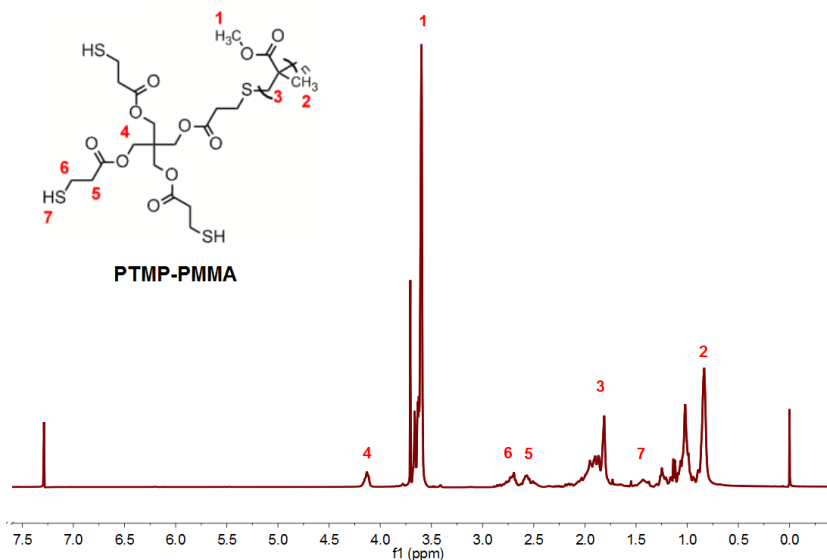

**Fig. S2**  $^1\text{H}$  NMR of polymer PTMP-PMMA

PTMP-PBMA ( $\text{CDCl}_3$ )  $\delta$  (ppm): 0.8-1.08  $\text{CH}_3$ , 1.31-1.50  $\text{CH}_2$ , 1.51-1.70  $\text{CH}_2$ , 1.72-2.12  $\text{CH}_2$ , 2.47-2.63  $\text{CH}_2$  (from PTMP), 2.63-2.78  $\text{CH}_2$  (from PTMP), 3.52-3.65  $\text{CH}_3$ , 3.84-4.06  $\text{CH}_2$ , 4.08-4.18  $\text{CH}_2$  (from PTMP)

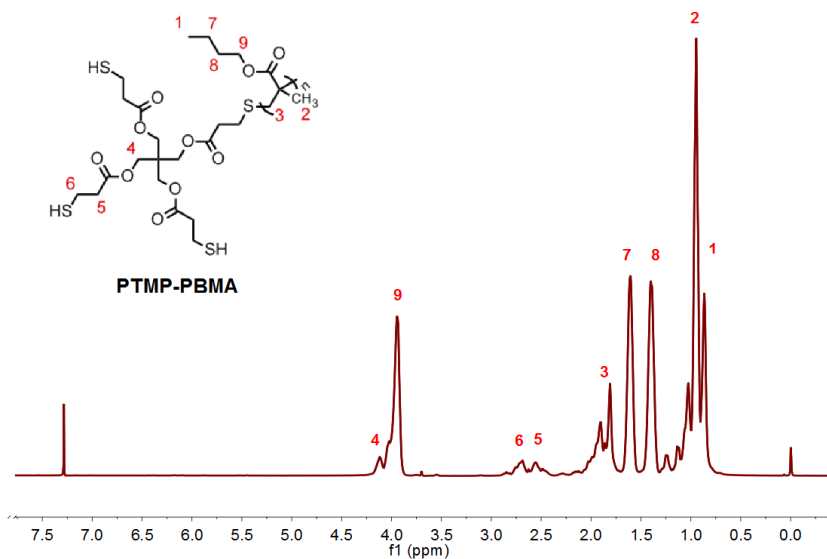

**Fig. S3**  $^1\text{H}$  NMR of polymer PTMP-PBMA

PTMP-PtBMA ( $\text{CDCl}_3$ )  $\delta$  (ppm): 0.9-1.2  $\text{CH}_3$ , 1.35-1.5  $\text{SH}$  (from PTMP), 1.72-2.12  $\text{CH}_2$ , 2.47-2.63  $\text{CH}_2$  (from PTMP), 2.63-2.78  $\text{CH}_2$  (from PTMP), 4.08-4.18  $\text{CH}_2$  (from PTMP)

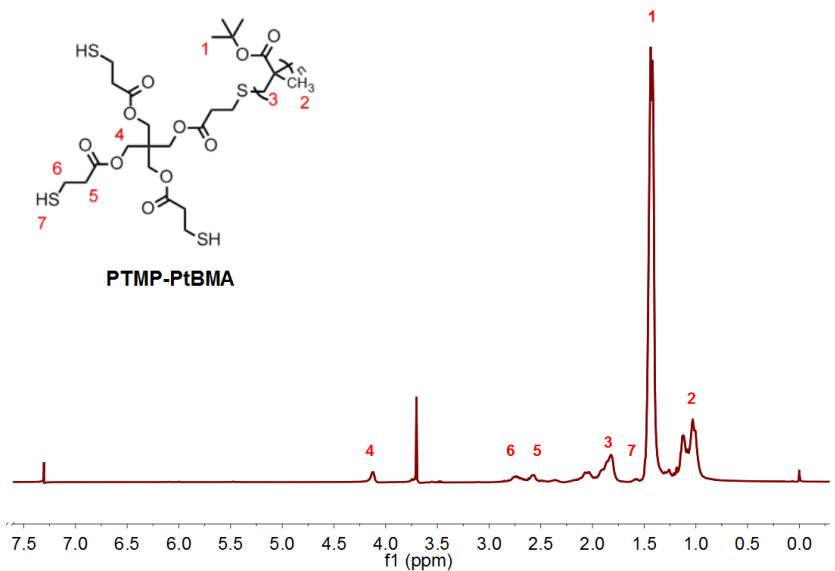

**Fig. S4**  $^1\text{H}$  NMR of polymer PTMP-PtBMA

**Table S1** Molecular weight and poly dispersity of PTMP-PMMA, PTMP-PBMA, and PTMP-PtBMA polymers measured by  $^1\text{H}$  NMR and GPC method.

| Polymer Ligands | $^1\text{H}$ NMR | GPC           |       |
|-----------------|------------------|---------------|-------|
|                 | $M_n$ (g/mol)    | $M_n$ (g/mol) | $PDI$ |
| PTMP-PMMA       | 4300             | 4000          | 1.88  |
| PTMP-PBMA       | 5650             | 5100          | 1.74  |
| PTMP-PtBMA      | 5800             | 5250          | 1.71  |

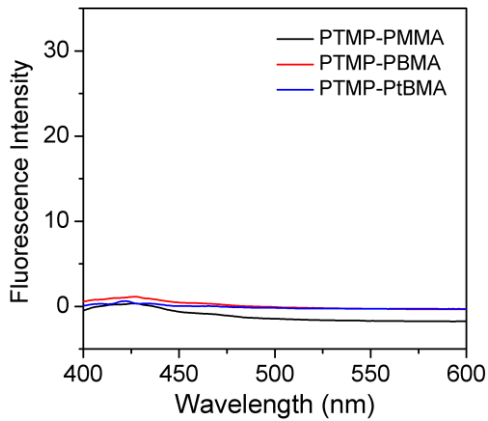

**Fig. S5** Fluorescence emission spectra of polymer PTMP-PMMA, PTMP-PBMA, and PTMP-PtBMA, .

## SI-2: The Characterization of Au NCs

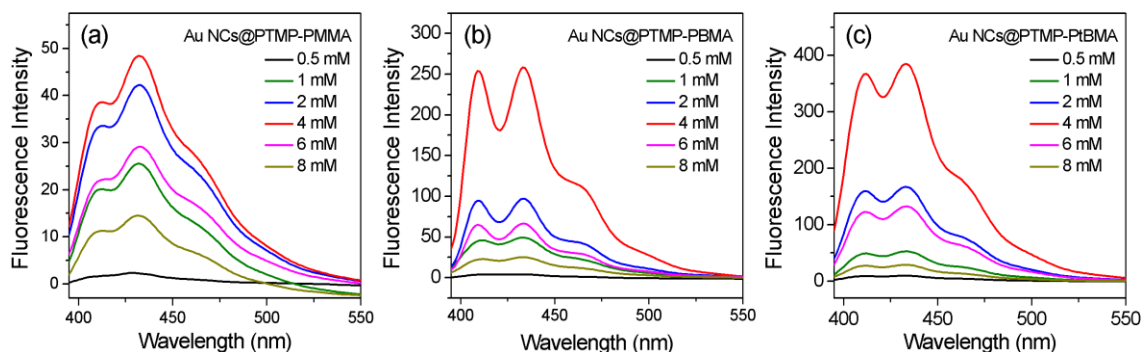

**Fig. S6** Fluorescence emission spectra (excited at 375 nm) of Au NCs prepared by (a) PTMP-PMMA (b) PTMP-PBMA (c) PTMP-PtBMA at different ligands concentrations under equal irradiation condition.

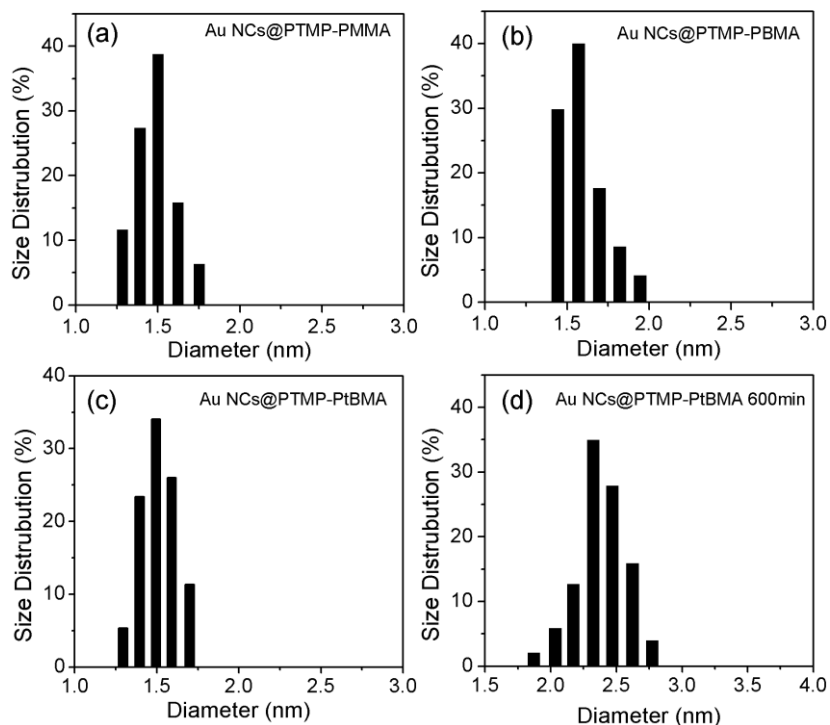

**Fig. S7** Size distribution determined by DLS of (a) Au NCs@PTMP-PMMA, (b) Au NCs@PTMP-PBMA and (c) Au NCs@PTMP-PtBMA prepared under UV irradiation for 480 min. (d) DLS of Au NCs@PTMP-PtBMA prepared under UV irradiation for 600 min

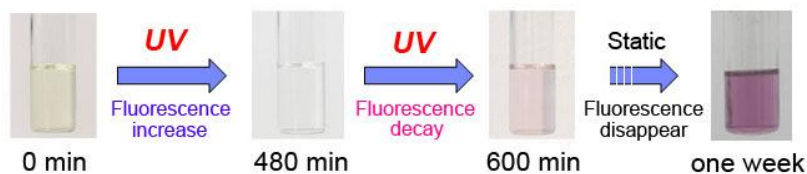

**Fig. S8** Photographs of Au NCs@PTMP-PtBMA irradiated by UV light for different time and placed at room temperature for one week after 600 min irradiation, all of the images were taken under daylight.

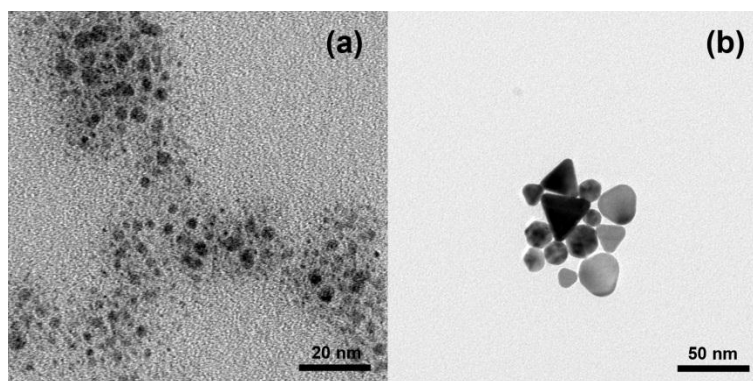

**Fig. S9** TEM images of Au NCs@PTMP-PtBMA prepared under UV irradiation for (a) 600 min and (b) placed in room temperature for one week after 600 min irradiation.

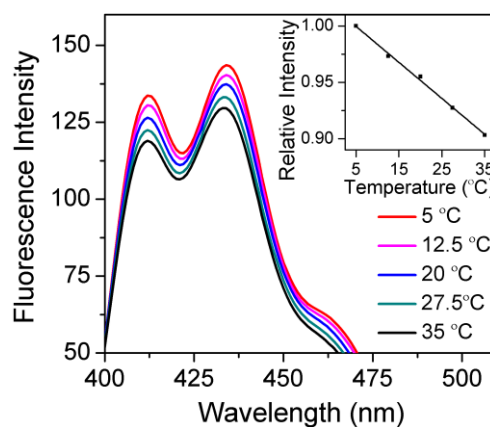

**Fig. S10** Fluorescence emission spectra of Au NCs@PTMP-PtBMA at different temperature. The inset of (d) shows their relative intensities compared to the strongest emission.

### SI-3: References and Notes.

- (1) Huang, X.; Li, B.; Li, L.; Zhang, H.; Majeed, I.; Hussain, I.; Tan, B. *J. Phys. Chem. C* **2012**, *116*, 448.
